# Supplementary material
Source: MDPI journal article supplement (https://www.mdpi.com/2075-1702/10/11/968)
Supplement: s1 [file s1]

## Supplementary Materials

### Bio-inspired artificial receptor with integrated tactile sensing and pain warning perceptual abilities

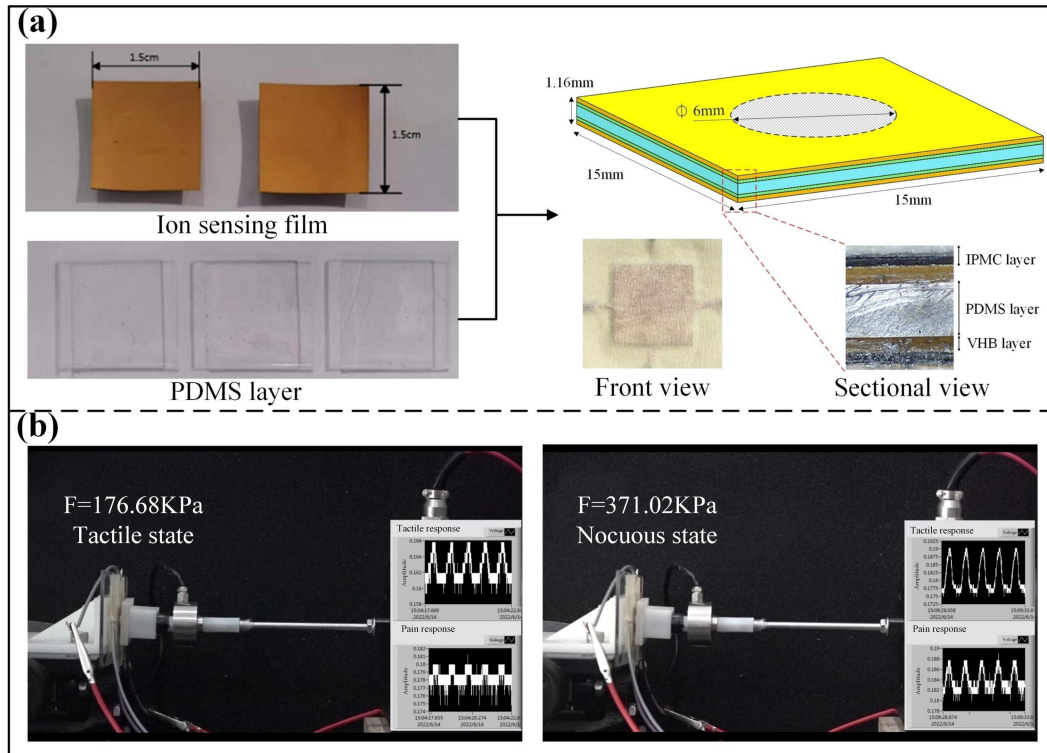

**Figure S1.** (a)The materials, front view and sectional view of artificial receptor (b)The pressure test experiments of artificial receptor.

**Table S1.** Material characteristic parameter

| Materials | Elastic modulus<br>(MPa) | Poisson's ratio<br>( $\mu$ ) | Density (g/cm <sup>3</sup> ) |
|-----------|--------------------------|------------------------------|------------------------------|
| IPMC      | 200                      | 0.33                         | 2.2                          |
| VHB       | 0.96                     | 0.35                         | 0.65                         |
| PDMS      | 2.3                      | 0.43                         | 1.10                         |

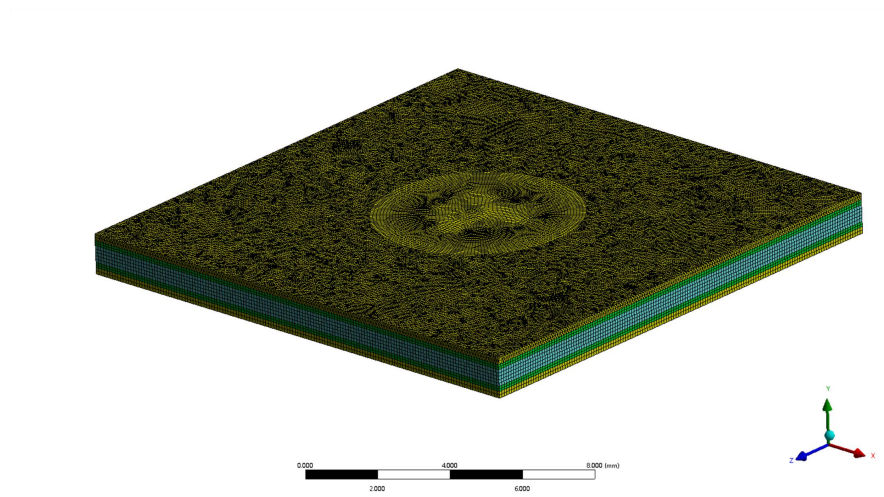

**Figure S2.** Schematic diagram of grid division
